# Supplementary material for: A Lab-on-a-Tube Biosensor Combining Recombinase-Aided Amplification and CRISPR-Cas12a with Rotated Magnetic Extraction for Salmonella Detection
Source: MDPI journal article supplement (doi:10.3390/mi14040830), 2023-04-09
Supplement: s1 [file s1]

**A Lab-on-a-Tube Biosensor Combining Recombinase Aided Amplification and  
CRISPR-Cas12a with Rotated Magnetic Extraction for *Salmonella* Detection**

**Table S1.** Nucleic acid sequences used in this work.

| Nucleic Acid ID                                | Sequences (5'-3')                                                                                                       |
|------------------------------------------------|-------------------------------------------------------------------------------------------------------------------------|
| RAA primer-F                                   | GGTCCAGTTTATCGTTATTACCAAAGGTTCA                                                                                         |
| RAA primer -R                                  | TTCAAATCGGCATCAATACTCATCTGTTTACCG                                                                                       |
| Complete nucleic acid sequence of RAA (111 bp) | GGTCCAGTTTATCGTTATTACCAAAGGTTCAGAACGTGTCGCGGAAGT<br>CGCGGCCCGATTTTCTCTGGATGGTATGCCCGGTAAACAGATGAGTATT<br>GATGCCGATTTGAA |
| PCR primer-F                                   | ATTGGCGATAGCCTGGCGGTGGGTTTTGTTGT                                                                                        |
| PCR primer-R                                   | TACCGGGCATACCATCCAGAGAAAATCGGGCCGC                                                                                      |
| DNA-TF-1                                       | TAATACGACTCACTATAGGGTAATTTCTACTAAGTGTAGATCCGGGCAT<br>ACCATCCAGAGAA                                                      |
| DNA-TR-1                                       | TTCTCTGGATGGTATGCCCCGGATCTACACTTAGTAGAAATTACCCTATA<br>GTGAGTCGTATTA                                                     |
| crRNA-1                                        | UAAUUUCUACUAAGUGUAGAUCCGGGCAUACCAUCCAGAGAA                                                                              |
| DNA-TF-2                                       | TAATACGACTCACTATAGGGTAATTTCTACTAAGTGTAGATCCGGGCAT<br>ACCATCCAGAGAA                                                      |
| DNA-TR-2                                       | TTCTCTGGATGGTATGCCCCGGATCTACACTTAGTAGAAATTACCCTATA<br>GTGAGTCGTATTA                                                     |
| crRNA-2                                        | UAAUUUCUACUAAGUGUAGAUCCGGGCAUACCAUCCAGAGAA                                                                              |
| ssDNA-FQ reporter                              | FAM-AAAAAAAAAAAAAAAAAAAAA-BHQ                                                                                           |

**Table S2.** The purify value of crRNA.

| crRNA   | OD 260/280 | OD 260/230 |
|---------|------------|------------|
| crRNA-1 | 1.91±0.00  | 2.21±0.04  |
| crRNA-2 | 1.97±0.01  | 2.29±0.02  |

**Table S3.** Comparison of this biosensor with some recently reported methods.

| Methods                              | Targets                      | Total Time | Detection limit /Detection volume | Steps                                                               | References |
|--------------------------------------|------------------------------|------------|-----------------------------------|---------------------------------------------------------------------|------------|
| LAMP                                 | <i>Salmonella</i>            | 3 h        | 100 CFU/mL/<br>~1.5mL             | Lysis, extraction,<br>amplification                                 | [1]        |
| Microfluidic&<br>LAMP                | SARS-<br>CoV-2               | 1.5 h      | 20 copies/ $\mu$ L/<br>50 $\mu$ L | RNA purification,<br>amplification                                  | [2]        |
| Microfluidic &<br>LAMP               | <i>Enterococcus faecalis</i> | 1 h        | 10 CFU/mL/<br>0.5mL               | Lysis, extraction,<br>amplification                                 | [3]        |
| Digital PCR                          | Lung cancer<br>cell L858R    | 1.2 h      | 10 copies/ $\mu$ L/<br>20 $\mu$ L | Amplification                                                       | [4]        |
| Digital PCR                          | <i>Salmonella</i>            | 8 h        | 0.2 CFU/mL/<br>25mL               | Enrichment, lysis,<br>amplification                                 | [5]        |
| PCR                                  | SARS-<br>CoV-2               | 1.4 h      | 100 copies/mL/<br>0.15mL          | RNA purification,<br>amplification                                  | [6]        |
| Electrochemical<br>Aptamer           | HBV                          | 1.2 h      | 10000 copy/mL/<br>1 mL            | DNA extraction                                                      | [7]        |
| RAA                                  | <i>Staphylococcus aureus</i> | 3.5 h      | 100 CFU/mL/<br>0.5mL              | DNA extraction,<br>amplification                                    | [8]        |
| Surface-enhanced<br>Raman scattering | <i>Salmonella</i>            | 2 h        | 70 CFU/mL/<br>0.2mL               | -                                                                   | [9]        |
| Colorimetric                         | <i>Salmonella</i>            | 0.8 h      | 60 CFU/mL/<br>0.03mL              | -                                                                   | [10]       |
| Electrochemistry                     | <i>Salmonella</i>            | 2 h        | 33 CFU/mL/<br>0.5mL               | -                                                                   | [11]       |
| This study                           | <i>Salmonella</i>            | 1.3 h      | 2 CFU/mL/<br>15mL                 | Enrichment, lysis,<br>extraction,<br>purification,<br>amplification |            |

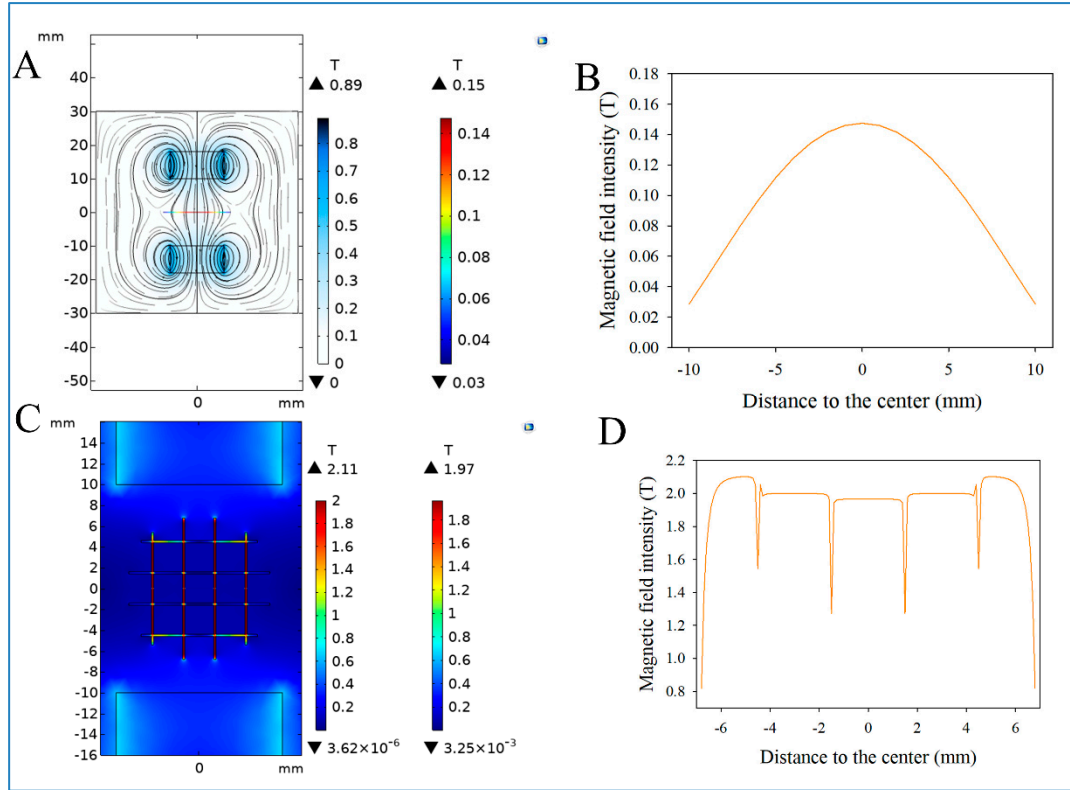

**Figure S1.** Magnetic field simulation (A) Simulation on the magnetic field intensity within two magnets. (B)Magnetic field intensity along the horizontal line. (C) Simulation on the magnetic field intensity of the iron wire netting inside two magnets at left second vertical line. (D)Magnetic field intensity of the iron wire netting inside two magnets at left second vertical line.

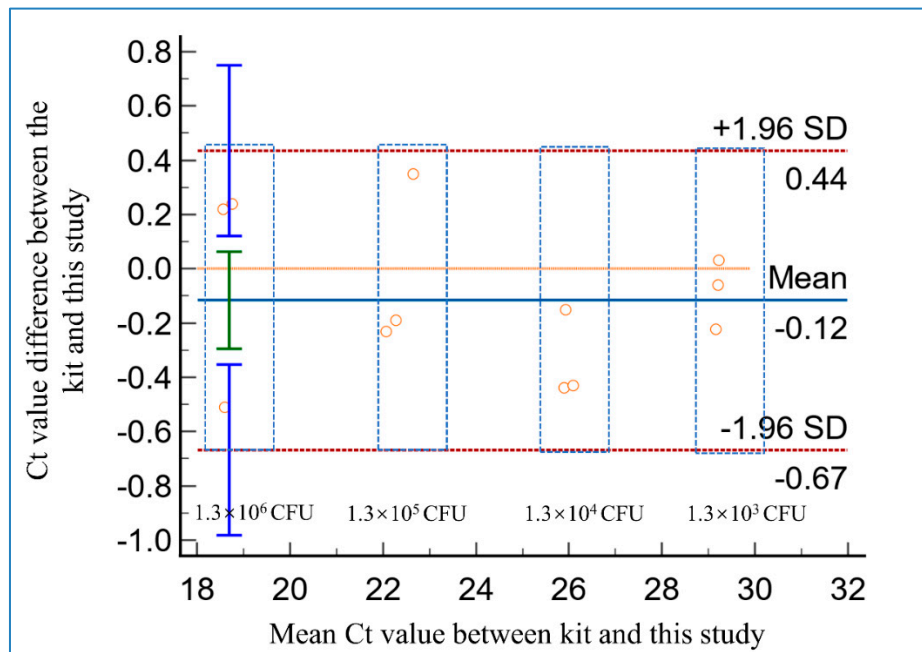

**Figure S2.** The Ct values of this study compared with the method recommended by the manufacturer ( $N = 3$ ). The x-axis was the mean Ct value of the kit and this study, and the y-axis was the Ct value difference between the kit and this study (that is, the Ct value using the kit subtracted from the Ct value using the extraction method in this study) ( $N=3$ ). The blue solid line indicated the mean of Ct value differences at different bacterial concentrations, and the red dashed lines indicated the mean differences  $\pm 1.96$  standard deviation (SD).

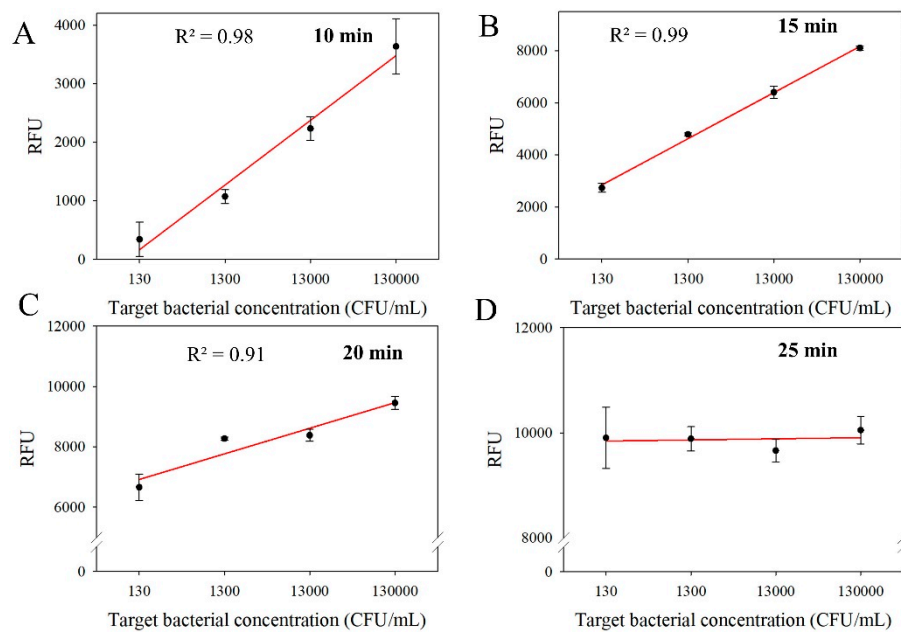

**Figure S3.** Fluorescent intensity results of different incubation time (N = 3).

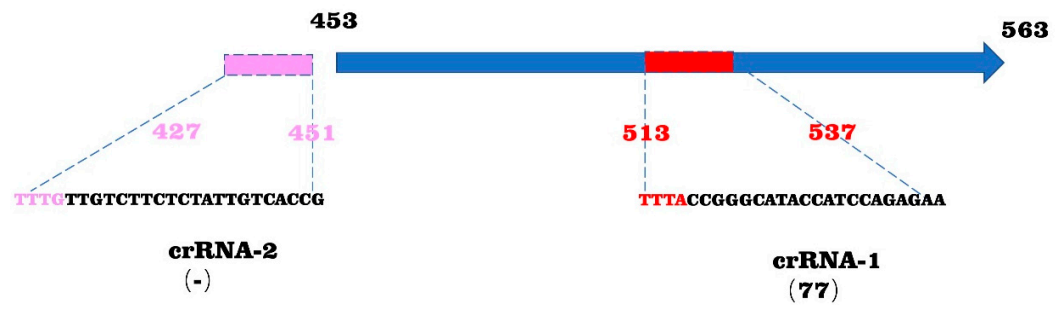

**Figure S4.** The PAM sequence positions (the TTTN form marked in pink and red, N represented A and G) in the amplification product (blue line).

## References

1. Chun, H.J.; Kim, S.; Han, Y.D.; Kim, K.R.; Kim, J.-H.; Yoon, H.; Yoon, H.C. Salmonella Typhimurium Sensing Strategy Based on the Loop-Mediated Isothermal Amplification Using Retroreflective Janus Particle as a Nonspectroscopic Signaling Probe. *ACS Sensors* **2018**, *3*, 2261–2268.
2. Nguyen, H.V. Total Integrated Centrifugal Genetic Analyzer for Point-of-Care Covid-19 Testing with Automatic and High-Throughput Capability. *Sens. Actuators B Chem.* **2022**, *353*, 131088.
3. Gowda, H.N. Development of a Proof-of-Concept Microfluidic Portable Pathogen Analysis System for Water Quality Monitoring. *Science of the Total Environment* **2022**, *813*, 152556.
4. Cui, X. Fast and Robust Sample Self-Digitization for Digital PCR. *Anal. Chim. Acta* **2020**, *1107*, 127–134.
5. Du, M.; Li, J.; Liu, Q.; Wang, Y.; Chen, E.; Kang, F.; Tu, C. Rapid Detection of Trace Salmonella in Milk Using an Effective Pretreatment Combined with Droplet Digital Polymerase Chain Reaction. *Microbiological Research* **2021**, *251*, 126838, doi:10.1016/j.micres.2021.126838.
6. Liang, C. A Film-Lever Actuated Switch Technology for Multifunctional, on-Demand, and Robust Manipulation of Liquids. *Nat. Commun.* **2022**, *13*, 4902.
7. Li, J. Amplification-Free Smartphone-Based Attomolar HBV Detection. *Biosens. Bioelectron.* **2021**, *194*, 113622.
8. Xie, G. Recombinase Aided Amplification with Photoreactive DNA-Binding Dye for Rapid Detection of Viable Staphylococcus Aureus. *LWT* **2021**, *135*, 110249.
9. Lin, H.-Y.; Huang, C.-H.; Hsieh, W.-H.; Liu, L.-H.; Lin, Y.-C.; Chu, C.-C.; Wang, S.-T.; Kuo, I.-T.; Chau, L.-K.; Yang, C.-Y. On-Line SERS Detection of Single Bacterium Using Novel SERS Nanoprobes and A Microfluidic Dielectrophoresis Device. *Small* **2014**, *10*, 4700–4710, doi:10.1002/smll.201401526.
10. Man, Y.; Ban, M.; Li, A.; Jin, X.; Du, Y.; Pan, L. A Microfluidic Colorimetric Biosensor for In-Field Detection of Salmonella in Fresh-Cut Vegetables Using Thiolated Polystyrene Microspheres, Hose-Based Microvalve and Smartphone Imaging APP. *Food Chemistry* **2021**, *354*, 129578, doi:10.1016/j.foodchem.2021.129578.
11. Hou, Y.; Cai, G.; Zheng, L.; Lin, J. A Microfluidic Signal-off Biosensor for Rapid and Sensitive Detection of Salmonella Using Magnetic Separation and Enzymatic Catalysis. *Food Control* **2019**, *103*, 186–193, doi:10.1016/j.foodcont.2019.04.008.
